# Supplementary material for: COVID-19 Attitudes and Vaccine Hesitancy among an Agricultural Community in Southwest Guatemala: A Cross-Sectional Survey
Source: MDPI journal article supplement (doi:10.3390/vaccines11061059), 2023-06-02
Supplement: s1 [file s1]

# 1 Actitudes sobre el COVID-19 e indecisión respecto a la vacuna en una comunidad agrícola en 2 el suroeste de Guatemala: una encuesta transversal

3 Neudy Rojop <sup>1</sup>, Diva M. Calvimontes <sup>1,2</sup>, Edgar Barrios <sup>1</sup>, Molly M. Lamb <sup>2,3</sup>, Alejandra Paniagua-Avila <sup>4</sup>,  
4 Jose Monzon <sup>5</sup>, Lindsey M. Duca <sup>5</sup>, Chelsea Iwamoto <sup>5</sup>, Anna N. Chard <sup>5</sup>, Melissa Gomez <sup>1</sup>, Kareen Arias <sup>1</sup>,  
5 Yannik Roell <sup>2</sup>, Guillermo Antonio Bolanos <sup>1</sup>, Emily Zielinski-Gutierrez <sup>5</sup>, Eduardo Azziz-Baumgartner <sup>5</sup>,  
6 Maria Renee Lopez <sup>6</sup>, Celia Cordon-Rosales <sup>6</sup>, Edwin J. Asturias <sup>1,2,3,7,\*</sup> and Daniel Olson <sup>1,2,3,7,\*</sup>

- 7 <sup>1</sup> Center for Human Development, Fundación para la Salud Integral de los Guatemaltecos, Retalhuleu  
8 11010, Guatemala; rojophernandez@gmail.com (N.R.); diva.barrientos@cuanschutz.edu (D.M.C.);  
9 ebarrios1908@gmail.com (E.B.); melissa.gomez.fsigcu@gmail.com (M.G.); kareen.arias@gmail.com (K.A.);  
10 antonio.bolanos@cuanschutz.edu (G.A.B.); edwin.asturias@cuanschutz.edu (E.J.A.)  
11 <sup>2</sup> Center for Global Health, Colorado School of Public Health, Aurora, CO 80045, USA;  
12 molly.lamb@cuanschutz.edu (M.M.L.); yannik.roell@cuanschutz.edu (Y.R.)  
13 <sup>3</sup> Department of Epidemiology, Colorado School of Public Health, Aurora, CO 80045, USA  
14 <sup>4</sup> Department of Epidemiology, Mailman School of Public Health, Columbia University, New York, NY  
15 11032, USA; mp3856@cumc.columbia.edu  
16 <sup>5</sup> Centers for Disease Control and Prevention (CDC), Atlanta, GA 30333, USA; rgi4@cdc.gov (J.M.);  
17 pgz5@cdc.gov (L.M.D.); oeu5@cdc.gov (C.I.); mmn9@cdc.gov (A.N.C.); ebz0@cdc.gov (E.Z.-G.);  
18 eha9@cdc.gov (E.A.-B.)  
19 <sup>6</sup> Centro de Estudios en Salud, Universidad del Valle de Guatemala, Guatemala City 01015, Guatemala;  
20 mlopez@ces.uvg.edu.gt (M.R.L.); ccordon@ces.uvg.edu.gt (C.C.-R.)  
21 <sup>7</sup> Department of Pediatrics, University of Colorado School of Medicine, Aurora, CO 80045, USA  
22 \* Correspondence: daniel.olson@cuanschutz.edu; Tel.: +720-777-6981  
23

## 24 25 **Resumen**

26 A pesar de que a partir de julio del 2021 ofrece vacunas contra el COVID-19 gratuitas,  
27 Guatemala tiene una de las tasas de vacunación más bajas en Latinoamérica. Desde el 28 de  
28 septiembre del 2021 hasta el 11 de abril del 2022, hicimos una encuesta transversal a miembros  
29 de la comunidad, en la que adaptamos un cuestionario de los CDC, para evaluar el acceso a la  
30 vacuna contra el COVID-19 y la indecisión respecto a la vacuna. De los 233 participantes de  $\geq 12$   
31 años, 127 (55 %) habían recibido  $\geq 1$  dosis de la vacuna contra el COVID-19 y 4 (2 %) notificaron  
32 haber tenido previamente la enfermedad. Era más probable que las personas de  $\geq 12$  años no  
33 vacunadas (n=106) fueran mujeres (73 % vs. 41 %,  $p < 0.001$ ) y amas de casa (69 % vs. 24 %,  $p < 0.01$ ),  
34 en comparación con los participantes vacunados (n=127). Entre las personas de  $\geq 18$

35 años, la principal motivación para vacunarse reportada entre los participantes vacunados fue  
36 proteger la salud de la familia/amigos (101/117, 86 %); 40 personas no vacunadas (55 %)  
37 reportaron tener poca confianza/nada de confianza en las instituciones de salud pública que  
38 recomiendan la vacunación contra el COVID-19. Los programas de vacunación basados en la  
39 comunidad o en el hogar, incluida la vacunación de familias a través del lugar de trabajo,  
40 podrían llegar mejor a las mujeres que son amas de casa, y reducir las inequidades y la  
41 indecisión. (S1: manuscrito traducido al español).

## 42 **Introducción**

43 A pesar de la carga significativa que tiene el COVID-19, a nivel económico y como  
44 enfermedad, y de que la vacunación es gratuita, los países de bajos y medianos ingresos han  
45 tenido dificultades para lograr altas tasas de vacunación. El acceso limitado a las vacunas y,  
46 cada vez más, la indecisión respecto a la vacuna provocan reiteradas olas de transmisión  
47 comunitaria y desperdician recursos valiosos.<sup>1, 2</sup>

48 El acceso a las vacunas y la renuencia a las vacunas son dos fenómenos distintos, pero  
49 superpuestos, que se han identificado como barreras para la vacunación mundial en general y la  
50 vacunación contra COVID-19 en particular. [3,4] Muchas poblaciones tanto en los países de  
51 ingresos altos (HIC) como en los LMIC enfrenta barreras constantes para el acceso a las vacunas,  
52 con una menor asignación de vacunas y una infraestructura logística y de salud pública más  
53 deficiente; estas barreras se vieron exacerbadas por la pandemia de COVID-19. [3,5,6]

54 Además, tanto los países de ingresos altos con mayor acceso a vacunas efectivas, como los LMIC  
55 cada vez más, se han visto afectados por la indecisión ante las vacunas. [4,7] El grupo de trabajo sobre la  
56 reticencia a la vacunación del Grupo Estratégico Consultivo de Expertos (SAGE) de la Organización  
57 Mundial de la Salud (OMS) define la reticencia a la vacunación como “un retraso en la aceptación o el  
58 rechazo de la vacunación a pesar de la disponibilidad de servicios de vacunación” [8]. Es importante  
59 señalar que la indecisión ante las vacunas es “compleja y específica del contexto”, “varía en función del  
60 tiempo, el lugar y las vacunas” e “influye la complacencia, la conveniencia y la confianza”. Por lo tanto,  
61 abordar el acceso a las vacunas y la indecisión requiere una comprensión dinámica de contexto local.

62 Guatemala es uno de estos países, con un historial de acceso inconsistente a las vacunas y una  
63 alta aceptación de las mismas, aunque la indecisión ante las vacunas en ciertas poblaciones está

64 aumentando, específicamente durante la pandemia de COVID-19. [9-13] El sistema sanitario de  
65 Guatemala se compone de dos sectores, público y privado. El primero comprende el Ministerio de Salud  
66 Pública y Asistencia Social (MSPAS), que cubre al 70% de la población, incluido su programa de  
67 inmunización, el Instituto Guatemalteco de Seguridad Social (IGSS), que da cobertura al 18% de la  
68 población vinculada al empleo formal, y el Servicio de Sanidad Militar, que presta servicios sanitarios a  
69 los miembros de las fuerzas armadas y la policía (menos del 0,5%). El sector privado incluye  
70 organizaciones de la sociedad civil y/o religiosas que operan sin ánimo de lucro, además de varios  
71 proveedores con ánimo de lucro. El MSPAS se financia con recursos procedentes de los impuestos  
72 estatales, ayudas, préstamos y donaciones internacionales.

73 Guatemala comenzó su programa de vacunación contra el COVID-19 el 25 de febrero del  
74 2021, dirigido a los trabajadores de la salud y a personas con enfermedades concomitantes; los  
75 adolescentes de 12 a 17 años fueron incluidos a partir del 22 de septiembre del 2021. A pesar de  
76 la cada vez mayor disponibilidad de vacunas contra el COVID-19 gratuitas, la cobertura en  
77 Guatemala sigue siendo una de las más bajas en Latinoamérica, especialmente en las  
78 comunidades rurales e indígenas. Hasta el 1.º de julio del 2022, solo el 46 % de la población  
79 elegible en Guatemala había recibido una dosis de la vacuna y el 35 % había recibido dos dosis.<sup>3</sup>

80 <sup>4</sup> Para abril del 2022, 1.47 millones de dosis de la vacuna contra el COVID-19 donadas por los  
81 Estados Unidos<sup>5</sup> y casi 5 millones de dosis compradas de la vacuna Sputnik V<sup>6</sup> habían vencido,  
82 supuestamente debido a la baja accesibilidad y demanda en todo el país.

83 Aunque existen datos limitados sobre la prevalencia cambiante de la indecisión y el  
84 acceso a las vacunas en toda Guatemala, especialmente en el contexto de la pandemia de  
85 COVID-19, algunas poblaciones no se han caracterizado bien. Una población crítica es la de los

86 trabajadores agrícolas esenciales, que representan el 35% de la mano de obra total de Guatemala  
87 y el 11,3% de su producto interior bruto [18]. Al igual que en muchos PIBM, los trabajadores  
88 agrícolas guatemaltecos no sólo desempeñan un papel fundamental en el suministro local de  
89 alimentos, sino también en la seguridad alimentaria mundial [19]. [A menudo son los  
90 principales generadores de ingresos para sus hogares y, como trabajadores esenciales, siguieron  
91 trabajando durante la pandemia a pesar de las altas tasas de infección por SARS-CoV-2 [20,21].  
92 Por lo tanto, comprender la dinámica y los factores que impulsan la no vacunación y la  
93 indecisión ante la vacuna en esta población activa es importante para reducir los efectos  
94 negativos del COVID-19 y otros patógenos emergentes mediante futuros programas de  
95 vacunación.

96 Por lo tanto, los objetivos de este estudio eran entender la frecuencia y los factores que  
97 impulsan la cobertura de la vacunación contra el COVID-19 y la indecisión respecto a la vacuna  
98 dentro de una comunidad agrícola en áreas rurales de Guatemala, con el fin de diseñar una  
99 intervención para mejorar la cobertura de la vacunación contra el COVID-19 (S1: manuscrito  
100 traducido al español).

## 101 **Métodos**

102 Hicimos una encuesta transversal para evaluar los conocimientos, las actitudes y las  
103 prácticas respecto al COVID-19 y las vacunas disponibles de manera gratuita. Esta encuesta se  
104 incluyó en la visita de inscripción de un estudio de cohorte prospectivo para caracterizar la  
105 transmisión del SARS-CoV-2 asintomática y presintomática en los hogares y los lugares de  
106 trabajo de trabajadores agrícolas bananeros. El estudio se hizo entre el 28 de septiembre del 2021

107 y el 11 de abril del 2022, en dos comunidades rurales (Los Encuentros en Quetzaltenango y  
108 Chiquirines en San Marcos) en las tierras bajas del suroeste de Guatemala, aproximadamente a  
109 50 km de la frontera con Chiapas, México. Las comunidades son monolingües de habla hispana.  
110 La población padece altas tasas de inseguridad alimentaria y desnutrición infantil durante todo  
111 el año, enfermedades diarreicas, depresión materna y morbilidad y mortalidad materna e  
112 infantil [22-24]. [22-24] Encuestas anteriores (2015, 2017-18) realizadas entre trabajadores  
113 agrícolas en las mismas comunidades encontraron una mano de obra predominantemente  
114 joven, masculina y económicamente vulnerable, en la que los trabajadores agrícolas tienden a  
115 ser los principales generadores de ingresos para sus hogares; los trabajadores informan de altas  
116 tasas de inseguridad alimentaria, pobreza y enfermedades transmisibles, así como de un bajo  
117 acceso a la atención sanitaria [25]. La emigración a EE.UU. de esta comunidad es frecuente,  
118 incluido el 3% en 2022 de un estudio de cohortes comunitario independiente (sin publicar).

119 Los criterios de inclusión para el estudio de origen y la encuesta fueron los siguientes:  $\geq 1$   
120 miembros del hogar empleados en el sector agrícola, deben vivir en las comunidades  
121 seleccionadas,  $\geq 75$  % de las personas que viven en la casa deben dar su consentimiento para  
122 participar, y al momento de la encuesta deben ser elegibles para recibir las vacunas contra el  
123 COVID-19 (edad de  $\geq 12$  años; solo es un criterio de inclusión para la encuesta). El cuestionario  
124 (S2: versiones en inglés y español de la encuesta) incluyó la encuesta adaptada en español  
125 “Confianza en la vacuna contra el COVID-19”, hecha por los Centros para el Control y la  
126 Prevención de Enfermedades (CDC),<sup>7</sup> La encuesta incluía las siguientes áreas temáticas y  
127 preguntas datos demográficos (edad, sexo, origen étnico); entorno laboral (ocupación, lugar de

128 trabajo); enfermedades preexistentes (asma, enfermedad pulmonar, enfermedad renal,  
129 enfermedad cardíaca, diabetes, trastorno sanguíneo, enfermedad neurológica y enfermedad  
130 hepática); conocimientos, actitudes y prácticas en relación con COVID-19 (CAP; exposición  
131 previa, nivel de preocupación, pruebas de confirmación, uso de equipo de protección individual  
132 [EPI]); historial de vacunación contra la COVID-19 (fecha(s), tipo(s) de vacuna(s), número de  
133 dosis); historial de rechazo a la vacunación y motivo(s) para ello; historial de no acceso a las  
134 vacunas y motivo(s) para ello. La encuesta también recogía preguntas específicas sobre la  
135 indecisión y la toma de decisiones en relación con la vacuna COVID-19, entre las que se incluían  
136 las siguientes: percepción de la seguridad de la vacunación, preferencias en cuanto a la  
137 vacunación (lugar), motivaciones para la vacunación, toma de decisiones entre iguales en  
138 relación con la vacunación COVID-19, uso de EPP si se vacuna, confianza en las instituciones de  
139 salud pública, cuantificación de la información disponible sobre la vacunación COVID-19 y  
140 exposición a información errónea sobre la vacuna COVID-19. Así como preguntas adicionales  
141 sobre características demográficas, estado de vacunación, y conocimientos, actitudes y prácticas  
142 sobre el COVID-19, las vacunas contra el COVID-19 y las vacunas en general. La encuesta fue  
143 hecha verbalmente a los adultos y niños (acompañados por adultos) por miembros del personal  
144 de enfermería del estudio capacitados, en los hogares o lugares de trabajo de los participantes, y  
145 las respuestas fueron grabadas usando la aplicación REDCap (University of Colorado Anschutz  
146 Medical Campus, Aurora CO, EE.UU.) en un *smartphone*.

147 Al momento de la encuesta, solo se ofrecía la vacunación contra el COVID-19 en puestos  
148 del Ministerio de Salud (por lo general dos días a la semana) y a través de programas de

149 vacunación en el lugar de trabajo por el sistema del Instituto Guatemalteco de Seguridad Social  
150 (IGSS), como el de la empresa agrícola que empleaba a por lo menos un miembro de cada hogar.  
151 Las vacunas disponibles en Guatemala, al momento de la encuesta, incluían la mRNA-1273  
152 (mRNA, Moderna, Cambridge, EE. UU.), BNT162b2 (mRNA, Pfizer-BioNTech, Nueva York, EE.  
153 UU.), ChAdOx1-S (vector viral, AstraZeneca, Cambridge, Inglaterra) y Gam-COVID-Vac (vector  
154 de virus, Sputnik V, Rusia). Todas estas vacunas requieren dos dosis en la serie primaria. En  
155 Guatemala, las personas de  $\geq 12$  años se volvieron elegibles para recibir la vacuna contra el  
156 COVID-19 en septiembre del 2021. Los datos de vacunación se obtuvieron directamente del  
157 registro nacional de vacunación y se verificaron a través del autorreporte de los participantes.

158 Se usó el *software* SPSS® (versión 25, Chicago, Il, EE. UU.) para hacer el análisis de los  
159 datos. Se consideró vacunados a los participantes con  $\geq 1$  dosis de la vacuna contra el COVID-19.  
160 Se usaron estadísticas descriptivas para caracterizar las respuestas de la encuesta. Se usó la  
161 prueba de la *U* de Mann-Whitney para las comparaciones de medianas, y la prueba de la  $\chi^2$  de  
162 Pearson y la prueba exacta de Fisher para las proporciones; un valor  $p < 0.05$  se consideró  
163 estadísticamente significativo. El estudio fue aprobado por la Universidad de Colorado  
164 (COMIRB, protocolo #21-2551), la Universidad del Valle de Guatemala (UVG) y comités de ética  
165 de los CDC; fue financiado por los CDC (CDCGH002243).

## 166 **Resultados**

167 Desde el 28 de septiembre del 2021 hasta el 11 de abril del 2022, inscribimos a 340  
168 personas (el 86 % de las 394 personas elegibles) de 74 hogares (véase el mapa, figura 1); 233  
169 personas (69 %) tenían  $\geq 12$  años y 190 personas (56 %) tenían  $\geq 18$  años (Tabla 1). Los hogares y



170 las personas de las comunidades de Chiquirines y Los Encuentros eran similares en cuanto a las  
171 características demográficas y los riesgos de exposición, aunque la media de ingresos mensuales  
172 de los hogares era ligeramente superior en Chiquirines (\$USD 250 frente a \$USD 197,37,  $p =$

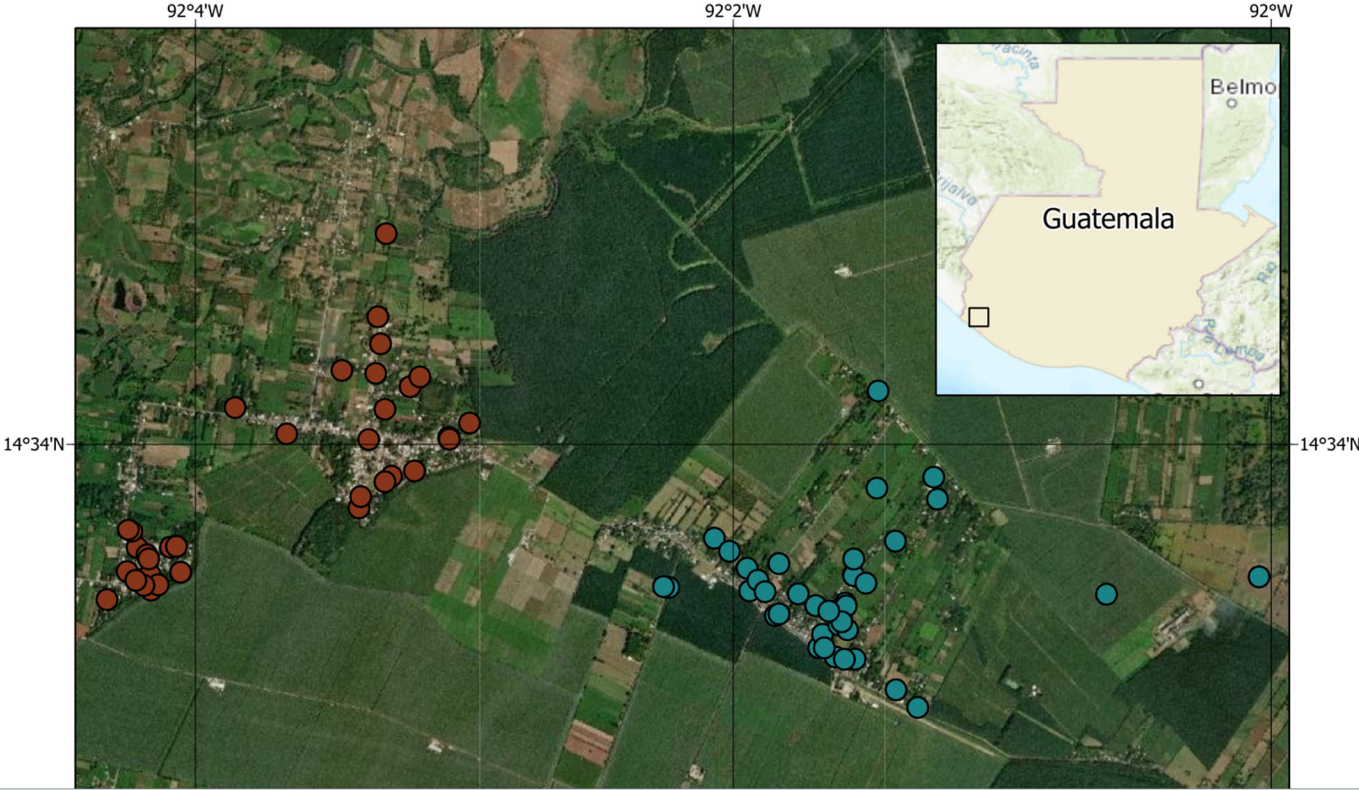

173 0,04). En general, la mediana de ingresos familiares mensuales era de \$210.73 =quartile  
174 deviation (QD) = \$92.11). De las 340 personas inscritas, 177 (52 %) eran mujeres, 323 (95 %) eran  
175 de etnicidad ladina/mestiza (mezcla de españoles e indígenas), y de aquellas personas de >15  
176 años, 107 (53 %) trabajaban fuera del hogar. La mediana de edad fue de 21 años (QD=12.25,  
177 rango=0-73 años). Ningún niño reportó asistir a la escuela, ya que todas las escuelas en la  
178 comunidad estaban cerradas debido a la pandemia de COVID-19.

179

180 **Figura 1.** Mapa que muestra las áreas de captación del estudio y los hogares de los municipios  
181 Chiquirines y los Encuentros que se incluyeron en la encuesta de indecisión a la vacuna, 28 de  
182 septiembre de 2021 a 11 de abril de 2022.

183

184 **Tabla 1.** Características sociodemográficas de los hogares inscritos en dos comunidades rurales en la  
185 Región del Trifinio del suroeste de Guatemala, 2021-2022.

186

| Variable                                               | Los Encuentros<br>(n=40) | Chiquirines<br>(n=34) | Valor $p^{**}$ |
|--------------------------------------------------------|--------------------------|-----------------------|----------------|
| <b>Hogar</b>                                           |                          |                       |                |
| Personas que viven en el hogar, mediana (QD)           | 5 (1)                    | 5 (1)                 | 0.76           |
| Niños que viven en el hogar, mediana (QD)              | 2(1)                     | 3 (1)                 | 0.22           |
| Camas en el hogar, mediana (QD)                        | 3 (1)                    | 3 (1.5)               | 0.90           |
| Ingresos familiares mensuales, \$USD, mediana (QD) *   | 197.37 (65.8)            | 260 (72.37)           | 0.04           |
| <b>A nivel individual</b>                              | <b>(n=181)</b>           | <b>(n=159)</b>        |                |
| Edad, mediana (DE)                                     | 21 (6.5)                 | 20 (12.5)             | 0.93           |
| Mujeres, n (%)                                         | 95 (52)                  | 82 (52)               | 0.86           |
| Etnicidad                                              |                          |                       |                |
| Ladina/mestiza**, n (%)                                | 166 (92)                 | 157 (99)              | < 0.01         |
| Indígena                                               | 3 (2)                    | 1 (0.5)               |                |
| No sabe                                                | 12 (6)                   | 1 (0.5)               |                |
| Reporta comorbilidad, n (%)                            | 33 (18)                  | 20 (13)               | 0.15           |
| Trabaja fuera del hogar, tiene $\geq 15$ años, n (%)   | 53/112 (47)              | 54/90 (60)            | 0.29           |
| Vacuna contra el COVID-19, tiene $\geq 12$ años, n (%) | 67/123 (54)              | 60/110 (55)           | 0.99           |

187

188 **Abreviaturas:** QD = desviación de cuartil, \* Tipo de cambio: \$1 USD (1 US dollar) = Q7.6 (7.6 Guatemala  
189 quetzales). \*\*Descendiente de mezcla de españoles e indígenas. \*\*\***Valor  $p$**  = se usó la prueba de la  $U$  de  
190 Mann-Whitney para las comparaciones de medianas, y la prueba de la  $\chi^2$  de Pearson y la prueba exacta  
191 de Fisher para las proporciones; un valor  $p < 0.05$  se consideró estadísticamente significativo en todas las  
192 comparaciones.

193

194 Al momento de la encuesta, 4 encuestados (2 %) reportaron haber tenido COVID-19  
195 previamente; 127 (55 %) reportaron haber recibido  $\geq 1$  dosis de una vacuna contra el COVID-19,  
196 lo cual incluyó mRNA-1273 (n=106, 83 %), ChAdOx1-S (n=15, 12 %), BNT162b2 (n=4, 3 %), Gam-  
197 COVID-Vac (n=1, 1 %) y Cansino (n=1, 1 %; administrada en la zona cercana de México). De

ellos, 89 (70%) declararon haber recibido dos dosis de la vacuna COVID-19, y la mayoría (n=88, 97%) recibieron la vacuna ARNm-1273. Sólo dos sujetos (2%) declararon haber recibido una tercera dosis de vacuna, que incluía vacunas de ARNm. Solo 11 participantes (5 %) reportaron haber rechazado alguna vez una vacuna en el pasado; las razones comunes de ese rechazo en el pasado fueron pensar que la vacuna no era necesaria (n=7, 64 %), preocupación por los efectos secundarios (n=2, 18 %) y que otra persona le dijera al encuestado que la vacuna no era segura (n=2, 18 %), (Tabla 2).

Cuarenta (17,2%) de los encuestados declararon no haber podido vacunarse anteriormente a pesar de haberlo intentado. Las razones más comunes fueron que la vacuna no estaba disponible (n = 14, 32%), no saber dónde vacunarse (n = 7, 16%), no poder salir del trabajo en horario de clínica (n = 5, 12%) y no saber dónde obtener información buena y fiable sobre la vacuna (n = 5, 12%).

210

**Tabla 2.** Datos sobre la vacunación contra el COVID-19 e indecisión respecto a la vacuna obtenidos de los encuestados elegibles para recibir la vacuna.

| <b>Vacunación contra el COVID-19 en participantes de ≥12 años.</b>             | <b>n (233)</b> |
|--------------------------------------------------------------------------------|----------------|
| Recibió la vacuna contra el COVID-19* n (%)                                    | 127 (55)       |
| Recibió 1 dosis de la vacuna contra el COVID-19, n (%)                         | 36 (28)        |
| Recibió 2 dosis de la vacuna contra el COVID-19, n (%)                         | 89 (70)        |
| Recibió 3 dosis (con dosis de refuerzo) de la vacuna contra el COVID-19, n (%) | 2 (2)          |
| <b><i>Primera dosis de la vacuna contra el COVID-19 (n=127)</i></b>            |                |
| Moderna, n (%)                                                                 | 106 (83)       |
| AstraZeneca, n (%)                                                             | 15 (12)        |
| Pfizer-BioNTech, n (%)                                                         | 4 (3)          |
| Sputnik V, n (%)                                                               | 1 (1)          |
| Otra (Cansino), n (%)                                                          | 1 (1)          |
| <b><i>Segunda dosis de la vacuna contra el COVID-19 (n=91)</i></b>             |                |

|                                                                                                                                 |              |
|---------------------------------------------------------------------------------------------------------------------------------|--------------|
| Moderna, n (%)                                                                                                                  | 88 (97)      |
| AstraZeneca, n (%)                                                                                                              | 2 (2)        |
| Sputnik V, n (%)                                                                                                                | 1 (1)        |
| <b>Tercera dosis (dosis de refuerzo) de la vacuna contra el COVID-19 (n= 2)</b>                                                 |              |
| Moderna, n (%)                                                                                                                  | 1 (50)       |
| Pfizer-BioNTech, n (%)                                                                                                          | 1 (50)       |
| <b>Indecisión respecto a la vacuna</b>                                                                                          |              |
| Antecedentes de COVID-19 (autorreportados), n (%)                                                                               | 4 (2)        |
| Se negó a recibir una vacuna de rutina previamente, n (%)                                                                       | 11 (5)       |
| <b>Razones para negarse a recibir la vacuna (n=11)**</b>                                                                        | <b>n (%)</b> |
| No pensé que fuera necesaria, n (%)                                                                                             | 7 (63)       |
| Me preocupaban los efectos secundarios, n (%)                                                                                   | 2 (18)       |
| Otra persona me dijo que la vacuna no era segura, n (%)                                                                         | 2 (18)       |
| Otra, n (%)                                                                                                                     | 3 (27)       |
| Previamente (antes de la pandemia), quiso recibir una vacuna de rutina (cualquier tipo), pero no pudo recibirla, n (%)          | 40 (17)      |
| <b>Razones más comunes para no haber podido, previamente, recibir una vacuna de rutina a pesar de tener la intención (n=40)</b> | <b>n (%)</b> |
| La vacuna no estaba disponible en mi centro de salud ni en mi comunidad                                                         | 14 (32)      |
| No sabía dónde ir para vacunarme                                                                                                | 7 (16)       |
| No sabía dónde obtener información buena y confiable sobre la vacuna                                                            | 5 (12)       |
| No podía pagar por la vacuna                                                                                                    | 1 (2)        |
| No podía dejar mi trabajo para recibir la vacuna durante el horario del centro médico                                           | 5 (12)       |
| Otra razón                                                                                                                      | 11 (26)      |

214 \* Se consideró vacunada a una persona con  $\geq 1$  dosis de la vacuna contra el COVID-19.

215 \*\* Puede elegir más de una respuesta.

216 Al comparar individuos vacunados y no vacunados > 12 años (elegibles) en el momento

217 de la encuesta era más probable que las personas vacunadas fueran hombres (59 % vs. 27 %,  $p$

218 <0.01), de mayor edad (mediana de edad = 33 vs. 25 años,  $p$  <0.01), que trabajaran fuera de la

219 casa (69 % vs. 24 %,  $p$  <0.01) o que trabajaran en una granja (70 % vs. 43 %,  $p=0.008$ ) (Tabla 3,

220 figura 2). De las personas vacunadas, 4 (3 %) reportaron haber rechazado otro tipo de

221 vacunación previamente (antes de la pandemia de COVID-19) vs. 7 (7 %) de las personas no

vacunadas ( $p=0.23$ ). No hubo diferencias entre las personas vacunadas y las no vacunadas en cuanto a los motivos por los que no pudieron acceder a las vacunas en el pasado.

Entre las personas de  $\geq 18$  años (Tabla 3), al momento de la encuesta, era más probable que las personas vacunadas estuvieran moderadamente o muy preocupadas por el COVID-19 ( $n=36$ , 31 %) en comparación con las personas no vacunadas ( $n=13$ , 18 %;  $p=0.04$ ). Las motivaciones más frecuentes reportadas para la vacunación contra el COVID-19 se muestran en la Tabla 3 e incluyen proteger la salud del participante, lo cual difería entre las personas vacunadas y las no vacunadas (24 % vs. 11 %, respectivamente;  $p<0.01$ ); no había diferencia entre la motivación relacionada con proteger a su familia/amigos (68 % vs. 73 %,  $p=0.53$ ), proteger a su comunidad (3 % vs. 3 %,  $p=0.94$ ), volver al trabajo o a la escuela (2,5% frente a 3,  $p=0.94$ ), o ser animado por otros a vacunarse (2% frente a 0%,  $p$  = no calculable). En comparación con las personas vacunadas, era más probable que las no vacunadas reportaran tener poca confianza/nada de confianza en las instituciones de salud pública (38 % vs. 55 %,  $p=0.02$ ). Entre los 73 participantes no vacunados  $>18$  años (38 %), el 25 % reportó que se pondría la vacuna lo antes posible, el 40 % reportó que se pondría la vacuna pero esperaría, el 11 % respondió que no se pondría la vacuna y el 25 % reportó no estar seguro.

**Tabla 3.** Comparación de participantes de  $\geq 12$  años vacunados y no vacunados contra el COVID-19.

| Variable                       | Vacunado n=127 (%) | No vacunado n=106 (%) | Valor $p^{**}$ |
|--------------------------------|--------------------|-----------------------|----------------|
| Edad, mediana (QD)             | 33 (7)             | 25 (10)               | <0.01          |
| 12 – 17                        | 10 (8)             | 33 (31)               | <0.01          |
| 18 – 30                        | 44 (35)            | 37 (35)               | 0.96           |
| 31 – 40                        | 42 (33)            | 19 (18)               | <0.01          |
| $\geq 41$                      | 31 (24)            | 17 (16)               | 0.11           |
| Mujer, n (%)                   | 52 (41)            | 77 (73)               | <0.01          |
| Ladino/mestizo, n (%)          | 122 (96)           | 98 (93)               | 0.45           |
| Trabaja fuera del hogar, n (%) | 87 (69)            | 25 (24)               | <0.01          |

|                                                                                                                |                   |                 |      |
|----------------------------------------------------------------------------------------------------------------|-------------------|-----------------|------|
| Comorbilidad presente, n (%)*                                                                                  | 30 (24)           | 17 (16)         | 0.15 |
| ¿Se negó a recibir una vacuna previamente n (%)                                                                | 4 (3)             | 7 (7)           | 0.23 |
| <b>Razones para negarse a recibir la vacuna (puede seleccionar ≥1)</b>                                         | <b>n=4</b>        | <b>n=7</b>      |      |
| No pensé que fuera necesaria                                                                                   | 2 (50)            | 5 (71)          | 0.57 |
| No sabía dónde obtener información confiable                                                                   | 1 (25)            | 0 (0)           | n/a  |
| Me preocupaban los efectos secundarios                                                                         | 0 (0)             | 2 (29)          | n/a  |
| Otra persona me dijo que la vacuna no era segura                                                               | 0 (0)             | 2 (29)          | n/a  |
| Miedo a las agujas                                                                                             | 0 (0)             | 1 (14)          | n/a  |
| No pude salir del trabajo/casa para ir a vacunarme                                                             | 1 (25)            | 0 (0)           | n/a  |
| Previamente (antes de la pandemia), quiso recibir una vacuna (cualquier tipo), pero no pudo recibirla          | 19 (15)           | 21 (20)         | 0.32 |
| <b>Razones por las que no pudo vacunarse (antes de la pandemia, puede seleccionar ≥1)</b>                      | <b>n=19</b>       | <b>n=21</b>     |      |
| La vacuna no estaba disponible en mi centro de salud ni en mi comunidad                                        | 5 (26)            | 9 (43)          | 0.27 |
| No sabía dónde ir para vacunarme                                                                               | 3 (16)            | 4 (19)          | 1.00 |
| No sabía dónde obtener información buena y confiable sobre la vacuna                                           | 2 (11)            | 3 (14)          | 1.00 |
| No podía pagar por la vacuna                                                                                   | 1 (5)             | 0 (0)           | n/a  |
| No podía dejar mi trabajo para recibir la vacuna durante el horario del centro médico                          | 4 (21)            | 1 (5)           | 0.17 |
| Otra barrera para recibir la vacuna                                                                            | 4 (21)            | 7 (33)          | 0.48 |
| <b>Participantes de ≥ 18 años</b>                                                                              | <b>n= 117 (%)</b> | <b>n=73 (%)</b> |      |
| <b>¿Qué tan preocupado está o estaba de contraer el COVID-19?</b>                                              |                   |                 |      |
| Para nada preocupado                                                                                           | 35 (30)           | 33 (45)         | 0.32 |
| Un poco preocupado                                                                                             | 46 (39)           | 27 (37)         | 0.74 |
| Moderadamente preocupado                                                                                       | 14 (12)           | 7 (10)          | 0.61 |
| Muy preocupado                                                                                                 | 22 (19)           | 6 (8)           | 0.04 |
| <b>Principal motivación para vacunarse contra el COVID-19</b>                                                  |                   |                 |      |
| Proteger mi salud                                                                                              | 28 (24)           | 8 (11)          | 0.02 |
| Proteger la salud de mi familia y mis amigos                                                                   | 80 (68)           | 53 (73)         | 0.53 |
| Proteger la salud de mi comunidad                                                                              | 3 (2.5)           | 2 (3)           | 0.94 |
| Regresar al trabajo o a la escuela                                                                             | 3 (2.5)           | 0 (0)           | n/a  |
| Otras personas me alentaron a vacunarme                                                                        | 2 (2)             | 0 (0)           | n/a  |
| Otra                                                                                                           | 1 (1)             | 0 (0)           | n/a  |
| No estoy seguro                                                                                                | 0 (0)             | 10 (13)         | n/a  |
| Poca confianza o nada de confianza en las instituciones de salud pública que recomiendan la vacunación         | 44 (38)           | 40 (55)         | 0.02 |
| Vio o escuchó información sobre las vacunas contra el COVID-19 (noticias, redes sociales, amigos y familiares) | 92 (79)           | 50 (69)         | 0.25 |
| No recibió suficiente información sobre las vacunas contra el COVID-19                                         | 14 (12)           | 21 (29)         | 0.01 |
| Sabe dónde conseguir información precisa y oportuna sobre las vacunas contra el COVID-19                       | 80 (68)           | 42 (57)         | 0.25 |

239 \* Comorbilidad se refiere a los participantes que reportaron tener al menos una de las siguientes afecciones: asma,  
240 enfermedad pulmonar, enfermedad renal, enfermedad cardíaca, diabetes, anemia, enfermedad neurológica y  
241 enfermedad hepática.

242 \*\* Valor p: se usó la prueba de la U de Mann-Whitney para las comparaciones de medianas, y la prueba  
243 de la  $\chi^2$  de Pearson y la prueba exacta de Fisher para las proporciones; un valor  $p < 0.05$  se consideró  
244 estadísticamente significativo en todas las comparaciones.

246

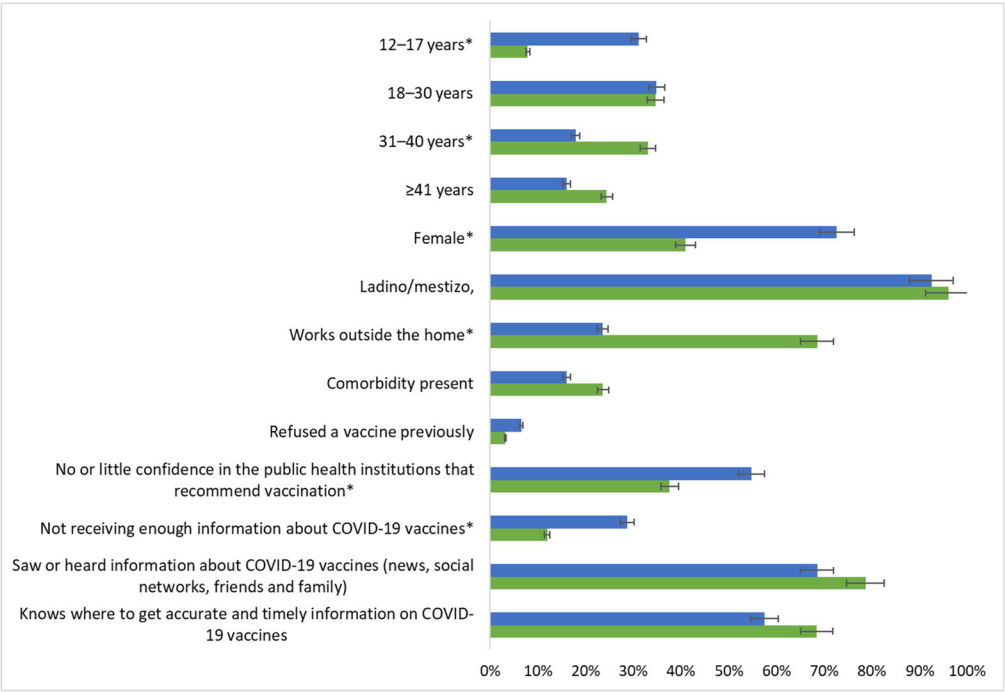

255

256

257 **Figura 2.** Comparación de miembros de la comunidad vacunados y no vacunados contra  
258 COVID-19 en la Región Trifinio del suroeste de Guatemala. \*Considerado estadísticamente  
259 significativo (valor  $p < 0,05$ ).

260

261 **Discusión**

262           Esta encuesta transversal muestra que, aunque el rechazo a las vacunas antes de la  
263   pandemia de COVID-19 era raro (5 %), en estas dos comunidades agrícolas de Guatemala, casi  
264   la mitad (45 %) de los participantes elegibles para la vacuna contra el COVID-19 permanecieron  
265   no vacunados contra esta enfermedad (con ninguna dosis) un año después de que la vacuna  
266   contra el COVID-19 estuvo disponible. Esto plantea la pregunta de cómo la distribución e  
267   información de la vacuna contra el COVID-19 pudo haber sido distinta en esta comunidad en  
268   comparación con programas de vacunación previos, lo que posiblemente contribuyó a una  
269   menor aceptación, utilización y confianza.

270           La mayoría de los encuestados que todavía no se habían vacunado eran mujeres amas de  
271   casa. Muchos de los hombres adultos en estas comunidades estaban empleados en grandes  
272   empresas agrícolas que ofrecían la vacunación contra el COVID-19 recomendada a través del  
273   lugar de trabajo, lo que parece indicar que un mayor acceso a la vacuna (a través del lugar de  
274   trabajo) podría mejorar la cobertura de la vacunación. En otros PBI y PIM también se  
275   observaron mayores tasas de vacunación e intención de vacunación entre los hombres [27,28],  
276   aunque se necesita más información sobre las razones de las mayores tasas de vacunación en  
277   estos otros entornos [25]. Otros estudios de América Latina también encontraron barreras  
278   estructurales como una razón común para la no vacunación contra COVID-19, destacando la  
279   interacción entre el acceso a la vacuna y la indecisión. [29] Ampliar estos programas en el lugar  
280   de trabajo a los miembros de la familia de los empleados e implementar intervenciones basadas  
281   en el hogar o la comunidad (lugares donde se practica la religión o donde se reúne la  
282   comunidad) podría aumentar el acceso para aquellas personas que permanecen sin vacunarse.



283 De hecho, en Gua-temala y en todo el mundo se ha propuesto involucrar a los líderes religiosos  
284 para reducir las dudas sobre las vacunas [10,15,30].

285 También hallamos evidencia de indecisión respecto a la vacuna. Las personas no  
286 vacunadas reportaron tener menor confianza en las instituciones de salud pública, no recibir  
287 suficiente información sobre las vacunas y no poder encontrar información precisa y oportuna  
288 sobre las vacunas contra el COVID-19.

289 Aunque los datos de los PBI y los PIM son limitados, se observaron resultados similares en un  
290 estudio cualitativo de trabajadores agrícolas latinos inmigrantes en California, EE.UU., en el que  
291 se descubrió que la desinformación y la falta de confianza en las instituciones son los temas  
292 principales que afectan a las actitudes hacia la vacunación [31].

293 Estos datos indican la necesidad de contar con mensajes de salud pública mejores y más  
294 eficaces en esta comunidad y en áreas rurales similares. De hecho, esta necesidad se ve  
295 agravada por la actual “infodemia” de desinformación de otras fuentes, lo cual se ha asociado a  
296 una mayor indecisión respecto a la vacuna.<sup>2, 9, 10, 11</sup> Es posible que los retrasos en lograr el acceso  
297 a la vacuna en estas comunidades rurales haya servido para socavar la aceptación de la vacuna  
298 y haya “abierto la puerta” a una mayor desinformación, lo cual contribuyó a una mayor  
299 indecisión y menor aceptación cuando la vacuna estuvo más ampliamente disponible. Futuros  
300 estudios, que incluyen una repetición de la encuesta sobre las dudas sobre las vacunas en la  
301 misma cohorte de hogares, ayudarán a clarificar este asunto y también abordar el cambio de  
302 creencias y comportamientos en torno a la vacunación contra COVID-19.

303 Este estudio es limitado ya que se llevó a cabo durante la visita de inscripción de un  
304 estudio de transmisión del SARS-CoV-2 en los hogares, y estuvo restringido a los hogares de los  
305 trabajadores empleados en grandes empresas agrícolas, lo cual limitó su generalizabilidad. Sin  
306 embargo, los trabajadores agrícolas conforman el 35 % de toda la fuerza laboral en Guatemala y  
307 por lo tanto representan una importante subpoblación en la cual estudiar el acceso a las vacunas  
308 y la indecisión respecto a ellas. Este grupo también es esencial para la seguridad alimentaria  
309 local y mundial. Las entrevistas de investigación cualitativa permitirían una evaluación más  
310 exhaustiva de los complejos factores que impulsan las dudas sobre las vacunas y las barreras de  
311 acceso en estas comunidades y otras similares. La encuesta también se llevó a cabo en un  
312 momento particular y podría no reflejar las cambiantes actitudes hacia las vacunas, aunque  
313 tenemos como objetivo abordar esta limitación con encuestas de seguimiento, como se ha  
314 indicado anteriormente

315 Estos hallazgos proveen una oportunidad para implementar mejores mensajes de salud  
316 pública basados en la evidencia y estrategias de acceso en la comunidad. Con base en la  
317 necesidad de comunicarse a nivel de hogar y para aumentar la participación de la comunidad y  
318 el intercambio de información, estamos diseñando una estrategia de mensajes de salud pública  
319 que involucre a un grupo de líderes comunitarios respetados (miembros del Consejo  
320 Comunitario de Desarrollo [COCODE], personal de enfermería de puestos de salud, parteras,  
321 maestros y líderes religiosos, entre otros) que serán capacitados para proporcionar información  
322 sobre la vacuna contra el COVID-19 en la comunidad. Simultáneamente, los puestos de salud en  
323 la comunidad están implementando un programa de vacunación casa por casa, por parte del

324 personal de enfermería de salud pública, que podría llegar a la población que no ha sido  
325 vacunada a través de sus lugares de trabajo. Después de este proceso, se volverá a hacer esta  
326 encuesta para identificar cambios en la indecisión respecto a la vacuna, y su aceptación y  
327 utilización.

328

329 **Financiamiento:** este estudio fue financiado por el Acuerdo de Cooperación de los CDC  
330 CDCGH002243. El Dr. Olson recibe financiamiento del NIH/NIAID 1K23AI143967 y de la  
331 subvención número UL1 TR001082 del NCATS de los NIH para el CTSI de Colorado. Los  
332 hallazgos y las conclusiones que aparecen en este informe pertenecen a los autores y no  
333 representan necesariamente los puntos de vista oficiales, ni un respaldo, de los Centros para el  
334 Control y la Prevención de Enfermedades, del Departamento de Salud y Servicios Humanos ni  
335 del Gobierno de los Estados Unidos.

336  
337 **Reconocimientos.** Les agradecemos a las siguientes personas o entidades por sus  
338 contribuciones a esta investigación: Equipo de Investigación de Trifinio de la Universidad de  
339 Colorado, la administración del Centro de Salud Global de la Universidad de Colorado,  
340 AgroAmérica. Les agradecemos a las personas de la comunidad del área Trifinio del Suroeste  
341 que participaron en esta investigación, a la Oficina Regional de los CDC en Centroamérica y al  
342 Grupo de Trabajo Internacional sobre el COVID-19 de los CDC, incluidas Nga Vuong, María  
343 Beatriz López Castellanos, María del Rosario Polo.

344  
345 **Contribuciones de los autores:** Conceptualización, NR, DMC, EB, MML, EZG, EAB, EJA y DO;  
346 Metodología, NR, DMC, EB, MML, JM, LMD, CI, AC, MG, EZG, EAB, EJA y DO; Software, NR;  
347 Validación, NR, EB; Análisis formal, NR, MML; Investigación, NR, DMC, EB, MML, APA, JM,  
348 LMD, CI, AC, MG, EZG, EAB, EJA y DO; Recursos, NR, MG; Redacción - Preparación del  
349 borrador original, NR, DO; Redacción - Revisión y edición, todos los autores; Visualización, NR,

350 EJA y DO. Redacción - Preparación del borrador original, NR, DO; Redacción - Revisión y  
351 edición, todos los autores; Visualización, NR, MML, DO; Supervisión, DMC, MML, EJA, DO;  
352 Administración del proyecto, DMC, EJA, DO; Adquisición de fondos, DO, EZG, EAB.

353

354 **Declaración de la Junta de Revisión Institucional:** El estudio se llevó a cabo de acuerdo con las  
355 directrices de la Declaración de Helsinki, y fue aprobado por la Junta de Revisión Institucional  
356 (o Comité de Ética) de la Universidad de Colorado (COMIRB, protocolo #21-2551) Universidad  
357 del Valle de Guatemala (UVG), y los comités de ética de los CDC; fue financiado por los CDC  
358 (CDCGH002243).

359

360 **Declaración de consentimiento informado:** Se obtuvo el consentimiento informado de todos  
361 los sujetos involucrados en el estudio.

362

363 **Declaración de disponibilidad de datos:** Los datos presentados en este estudio están  
364 disponibles previa solicitud al autor correspondiente. La disponibilidad de algunos de los datos  
365 está sujeta a restricciones, debido a la confidencialidad de los participantes, por lo que no se han  
366 hecho públicos.

367

368 Traducción realizada con la versión gratuita del traductor [www.DeepL.com/Translator](http://www.DeepL.com/Translator)

369

370 **Conflictos de interés:** DO recibe financiamiento a través de subvenciones de Roche y Sanofi.  
 371 MML recibe financiamiento a través de una subvención de Roche. EJA recibe financiamiento a  
 372 través de una subvención de Pfizer, y a través de consultorías de Curevac, Inovio y Moderna.

373

## 374 **Referencias**

- 375 1. Marcela Vélez C, 2021. UNESCO Office Montevideo and Regional Bureau for Science in Latin  
 376 America and the Caribbean United Nations Educational, Scientific and Cultural Organization  
 377 (UNESCO).
- 378 2. Lazarus JV, Wyka K, White TM, Picchio CA, Rabin K, Ratzan SC, Parsons Leigh J, Hu J, El-  
 379 Mohandes A, 2022. Revisiting COVID-19 vaccine hesitancy around the world using data from 23  
 380 countries in 2021. *Nat Commun* 13: 3801.
- 381 3. Md Khairi, L.N.H.; Fahrni, M.L.; Lazzarino, A.I. The Race for Global Equitable Access to COVID-  
 382 19 Vaccines. *Vaccines (Basel)* **2022**, *10*, doi:10.3390/vaccines10081306.
- 383 4. Larson, H.J.; Gakidou, E.; Murray, C.J.L. The Vaccine-Hesitant Moment. *N Engl J Med* **2022**, *387*,  
 384 58-65, doi:10.1056/NEJMr2106441.
- 385 5. Das, J.K.; Chee, H.Y.; Lakhani, S.; Khan, M.H.; Islam, M.; Muhammad, S.; Bhutta, Z.A. COVID-19  
 386 Vaccines: How Efficient and Equitable Was the Initial Vaccination Process? *Vaccines (Basel)* **2022**,  
 387 *11*, doi:10.3390/vaccines11010011.
- 388 6. Kuehn, M.; LaMori, J.; DeMartino, J.K.; Mesa-Frias, M.; Doran, J.; Korrapati, L.; Bhojwani, R.;  
 389 Lefebvre, P.; Kirson, N. Assessing barriers to access and equity for COVID-19 vaccination in the  
 390 US. *BMC Public Health* **2022**, *22*, 2263, doi:10.1186/s12889-022-14636-1.
- 391 7. Black, S.; Rappuoli, R. A crisis of public confidence in vaccines. *Sci Transl Med* **2010**, *2*, 61mr61,  
 392 doi:10.1126/scitranslmed.3001738.
- 393 8. MacDonald, N.E.; Hesitancy, S.W.G.o.V. Vaccine hesitancy: Definition, scope and determinants.  
 394 *Vaccine* **2015**, *33*, 4161-4164, doi:10.1016/j.vaccine.2015.04.036.
- 395 9. Domek, G.J.; O'Leary, S.T.; Bull, S.; Bronsert, M.; Contreras-Roldan, I.L.; Bolanos Ventura, G.A.;  
 396 Kempe, A.; Asturias, E.J. Measuring vaccine hesitancy: Field testing the WHO SAGE Working  
 397 Group on Vaccine Hesitancy survey tool in Guatemala. *Vaccine* **2018**, *36*, 5273-5281,  
 398 doi:10.1016/j.vaccine.2018.07.046.
- 399 10. Skinner, N.A.; Sanders, K.; Lopez, E.; Sotz Mux, M.S.; Abascal Miguel, L.; Vosburg, K.B.;  
 400 Johnston, J.; Diamond-Smith, N.; Kraemer Diaz, A. Barriers to COVID-19 vaccine acceptance to  
 401 improve messages for vaccine uptake in indigenous populations in the central highlands of  
 402 Guatemala: a participatory qualitative study. *BMJ Open* **2023**, *13*, e067210, doi:10.1136/bmjopen-  
 403 2022-067210.
- 404 11. Olson, D.; Krager, S.; Lamb, M.M.; Rick, A.M.; Asturias, E.J. Knowledge of Norovirus and  
 405 Attitudes toward a Potential Norovirus Vaccine in Rural Guatemala: A Cross-Sectional  
 406 Exploratory Survey. *Am J Trop Med Hyg* **2018**, *98*, 1498-1501, doi:10.4269/ajtmh.17-0771.

12. Olson, D.; Rick, A.M.; Krager, S.; Lamb, M.; Asturias, E.J. Vaccine Demand and Willingness-to-pay for Arbovirus Vaccines: A Cross-sectional Survey in Rural Guatemala. *Pediatr Infect Dis J* **2018**, *37*, 1184-1189, doi:10.1097/INF.0000000000002169.
13. Wagner, A.L.; Masters, N.B.; Domek, G.J.; Mathew, J.L.; Sun, X.; Asturias, E.J.; Ren, J.; Huang, Z.; Contreras-Roldan, I.L.; Gebremeskel, B.; et al. Comparisons of Vaccine Hesitancy across Five Low- and Middle-Income Countries. *Vaccines (Basel)* **2019**, *7*, doi:10.3390/vaccines7040155.
14. 2022. Situación de COVID-19 en Guatemala: Ministerio de Salud Pública y Asistencia Social.
15. Taylor L, 2022. Guatemala's COVID vaccine roll-out failed: here's what researchers know. Nature.
16. J V, 2022. Vence último lote de Moderna en Guatemala; 930 mil aún carecen de segunda dosis. La Hora. Guatemala City, Guatemala.
17. AL O, 2022. Se vencen las últimas dosis de Sputnik V, ¿cuántas dosis de otras vacunas nos quedan? Prensa Libre. Guatemala City, Guatemala.
18. Duff, A.; Padilla, A. *Latin America: agricultural perspectives*; September 25, 2015 2015.
19. Representative, O.o.t.U.S.T. Guatemala. Available online: <https://ustr.gov/countries-regions/western-hemisphere/guatemala> (accessed on
20. Iwamoto, C.; Lesteberg, K.E.; Lamb, M.M.; Calvimontes, D.M.; Guo, K.; Barrett, B.S.; Mickens, K.L.; Duca, L.M.; Monzon, J.; Chard, A.N.; et al. High SARS-CoV-2 Seroprevalence and Rapid Neutralizing Antibody Decline among Agricultural Workers in Rural Guatemala, June 2020-March 2021. *Vaccines (Basel)* **2022**, *10*, doi:10.3390/vaccines10071160.
21. Olson, D.; Calvimontes, D.M.; Lamb, M.M.; Guzman, G.; Barrios, E.; Chacon, A.; Rojop, N.; Arias, K.; Gomez, M.; Bolanos, G.A.; et al. Clinical and Economic Impact of COVID-19 on Agricultural Workers, Guatemala(1). *Emerg Infect Dis* **2022**, *28*, S277-S287, doi:10.3201/eid2813.212303.
22. Asturias, E.J.; Heinrichs, G.; Domek, G.; Brett, J.; Shick, E.; Cunningham, M.; Bull, S.; Celada, M.; Newman, L.S.; Tenney, L.; et al. The Center for Human Development in Guatemala: An Innovative Model for Global Population Health. *Adv Pediatr* **2016**, *63*, 357-387, doi:10.1016/j.yapd.2016.04.001.
23. Olson, D.; Lamb, M.; Lopez, M.R.; Colborn, K.; Paniagua-Avila, A.; Zacarias, A.; Zambrano-Perilla, R.; Rodriguez-Castro, S.R.; Cordon-Rosales, C.; Asturias, E.J. Performance of a Mobile Phone App-Based Participatory Syndromic Surveillance System for Acute Febrile Illness and Acute Gastroenteritis in Rural Guatemala. *J Med Internet Res* **2017**, *19*, e368, doi:10.2196/jmir.8041.
24. Kamidani, S.; Melgar, M.; Robinson, C.; Asturias, E.; Berman, S.; Gaensbauer, J. No Detection of Entamoeba Histolytica by Multiplex Polymerase Chain Reaction in Children With Acute Non-bloody Diarrhea in Guatemala. *Pediatr Infect Dis J* **2018**, *37*, e107-e108, doi:10.1097/INF.0000000000001756.
25. Olson, D.; Calvimontes, D.M.; Lamb, M.M.; Guzman, G.; Barrios, E.; Chacon, A.; Rojop, N.; Arias, K.; Gomez, M.; Bolanos, G.A.; et al. Clinical and Economic Impact of COVID-19 on Plantation Workers: Preliminary Results from the Guatemala Agricultural Workers and Respiratory Illness Impact (AGRI) Study. *medRxiv* **2022**, doi:10.1101/2022.02.07.22270274.
26. 2021. Confianza en la vacuna contra el COVID-19 Guía para la evaluación rápida de la comunidad: Center for Disease Control and Prevention.

27. Patwary, M.M.; Bardhan, M.; Haque, M.Z.; Sultana, R.; Alam, M.A.; Browning, M. COVID-19 Vaccine Acceptance Rate and Its Factors among Healthcare Students: A Systematic Review with Meta-Analysis. *Vaccines (Basel)* **2022**, *10*, doi:10.3390/vaccines10050806.
28. Urrunaga-Pastor D, Bendezu-Quispe G, Herrera-Anazco P, Uyen-Cateriano A, Toro-Huamanchumo CJ, Rodriguez-Morales AJ, Hernandez AV, Benites-Zapata VA, 2021. Cross-sectional analysis of COVID-19 vaccine intention, perceptions and hesitancy across Latin America and the Caribbean. *Travel Med Infect Dis* 41: 102059.
29. Bates, B.R.; Villegas-Botero, A.; Costales, J.A.; Moncayo, A.L.; Tami, A.; Carvajal, A.; Grijalva, M.J. COVID-19 Vaccine Hesitancy in Three Latin American Countries: Reasons Given for Not Becoming Vaccinated in Colombia, Ecuador, and Venezuela. *Health Commun* **2022**, *37*, 1465-1475, doi:10.1080/10410236.2022.2035943.
30. Kibongani Volet, A.; Scavone, C.; Catalan-Matamoros, D.; Capuano, A. Vaccine Hesitancy Among Religious Groups: Reasons Underlying This Phenomenon and Communication Strategies to Rebuild Trust. *Front Public Health* **2022**, *10*, 824560, doi:10.3389/fpubh.2022.824560.
31. Gehlbach, D.; Vazquez, E.; Ortiz, G.; Li, E.; Sanchez, C.B.; Rodriguez, S.; Pozar, M.; Cheney, A.M. COVID-19 Testing and Vaccine Hesitancy in Latinx Farm-Working Communities in The Eastern Coachella Valley. *Res Sq* **2021**, doi:10.21203/rs.3.rs-587686/v1.
32. Rodriguez-Morales AJ, Franco OH, 2021. Public trust, misinformation and COVID-19 vaccination willingness in Latin America and the Caribbean: today's key challenges. *Lancet Reg Health Am* 3: 100073.
33. Zarocostas J, 2020. How to fight an infodemic. *Lancet* 395: 676.
34. Pierri F, Perry BL, DeVerna MR, Yang KC, Flammini A, Menczer F, Bryden J, 2022. Online misinformation is linked to early COVID-19 vaccination hesitancy and refusal. *Sci Rep* 12: 5966.
